# Supplementary material
Source: PubMed Central journal article supplement (PMC3233630)
Supplement: cc1019_3397SD1.pdf [file cc1019_3397SD1.pdf]

# Supplemental Figures

Erkizan et al.

Cell Cycle

# SUPPLEMENTAL FIGURE 1

A

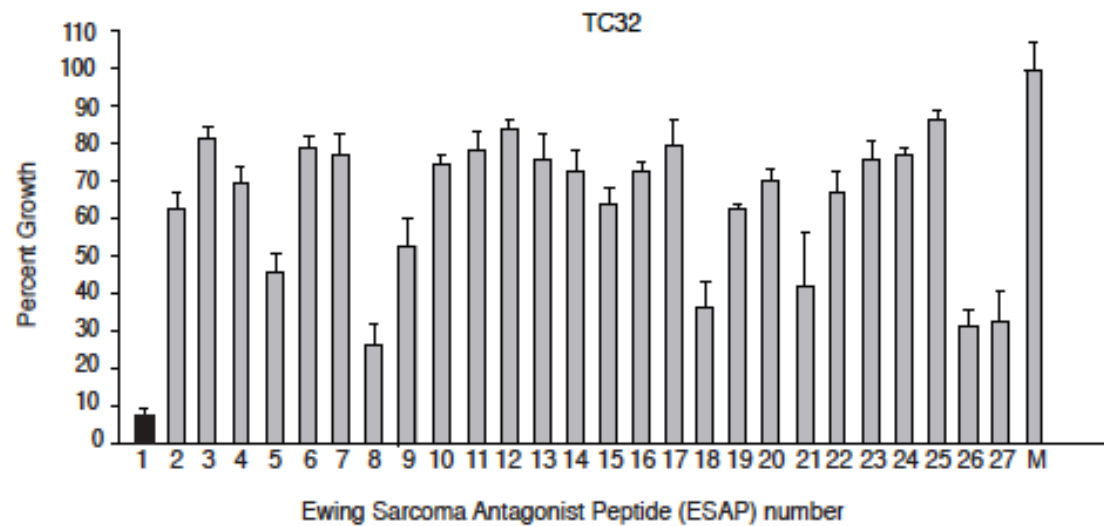

B

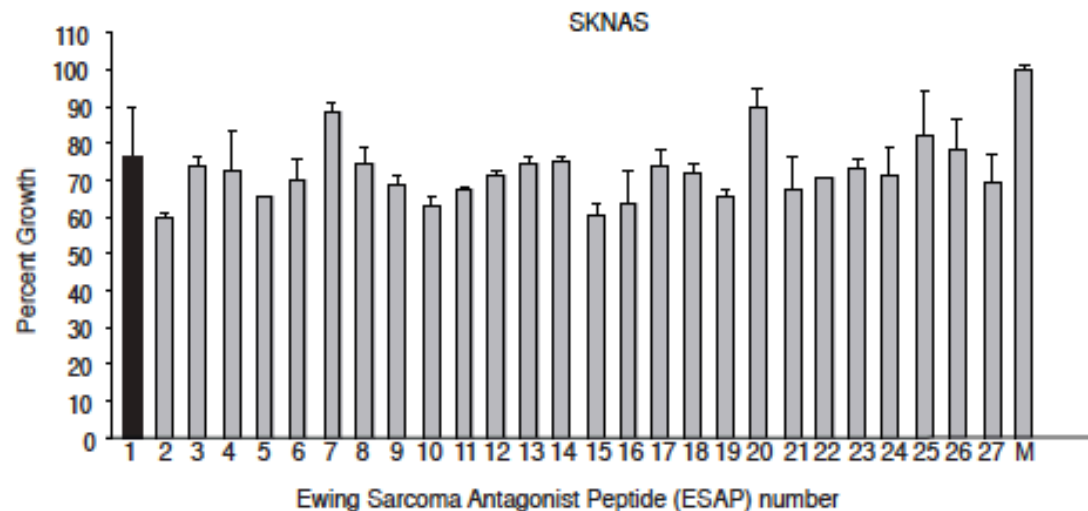

Legend: Cytotoxic evaluation of Ewing Sarcoma Antagonist Peptides. Ewing Tumor cell line TC32 and neuroblastoma cell line SKNAS were treated with 30 micromolar of Antennapedia fused ESAP peptides for 4 days. Black bar represents ESAP1, grey bars represent other peptides revealed from phage display. M is media only control.

## SUPPLEMENTAL FIGURE 2

|        |                      |                                                                                                                   |
|--------|----------------------|-------------------------------------------------------------------------------------------------------------------|
| BRD9   | NP_076413.3<br>ESAP1 | 161 EVVPVQVE T A K K S K K P S R E V I S C M F E P E G N A 191<br>1 ----- T M R G K K K R T R A N ----- 12        |
| TXNDC9 | NP_005774<br>ESAP1   | 201 K F G T N F T K L E K K T I R G K K Y D S D S D D D 226<br>1 ----- T M R G K K K R T R A N ----- 12           |
| MLL3   | NP_733751.2<br>ESAP1 | 1281 G I G G F M V R Q R S R T G Q G K T K R S V I R K 1305<br>1 ----- T M R G K K K R T R A N ----- 12           |
| MLL3   | NP_733751.2<br>ESAP1 | 3591 Q L Y S D I I P E E K G K K K R T R K K K R D D D A E S T K 3620<br>1 ----- T M R G K K K R T R A N ----- 12 |
| DDX27  | NP_060365.7<br>ESAP1 | 1 M V L A Q R R R G G C E K L R A G P Q A V L A S G S G F C D 30<br>1 ----- T M R G K K K R T R A N ----- 12      |
| DDX27  | NP_060365.7<br>ESAP1 | 661 K E K I A K A L Q E F D L A L R G K K K R K K F M K D A K K 690<br>1 ----- T M R G K K K R T R A N ----- 12   |
| DDX27  | NP_060365.7<br>ESAP1 | 711 A E R L A K R N R R A K R A R A M P E E E P V R G P A K K Q 740<br>1 ----- T M R G K K K R T R A N ----- 12   |

Legend: Blast results of ESAP1. Identity of amino acids was shown with vertical lines.

# SUPPLEMENTAL FIGURE 3

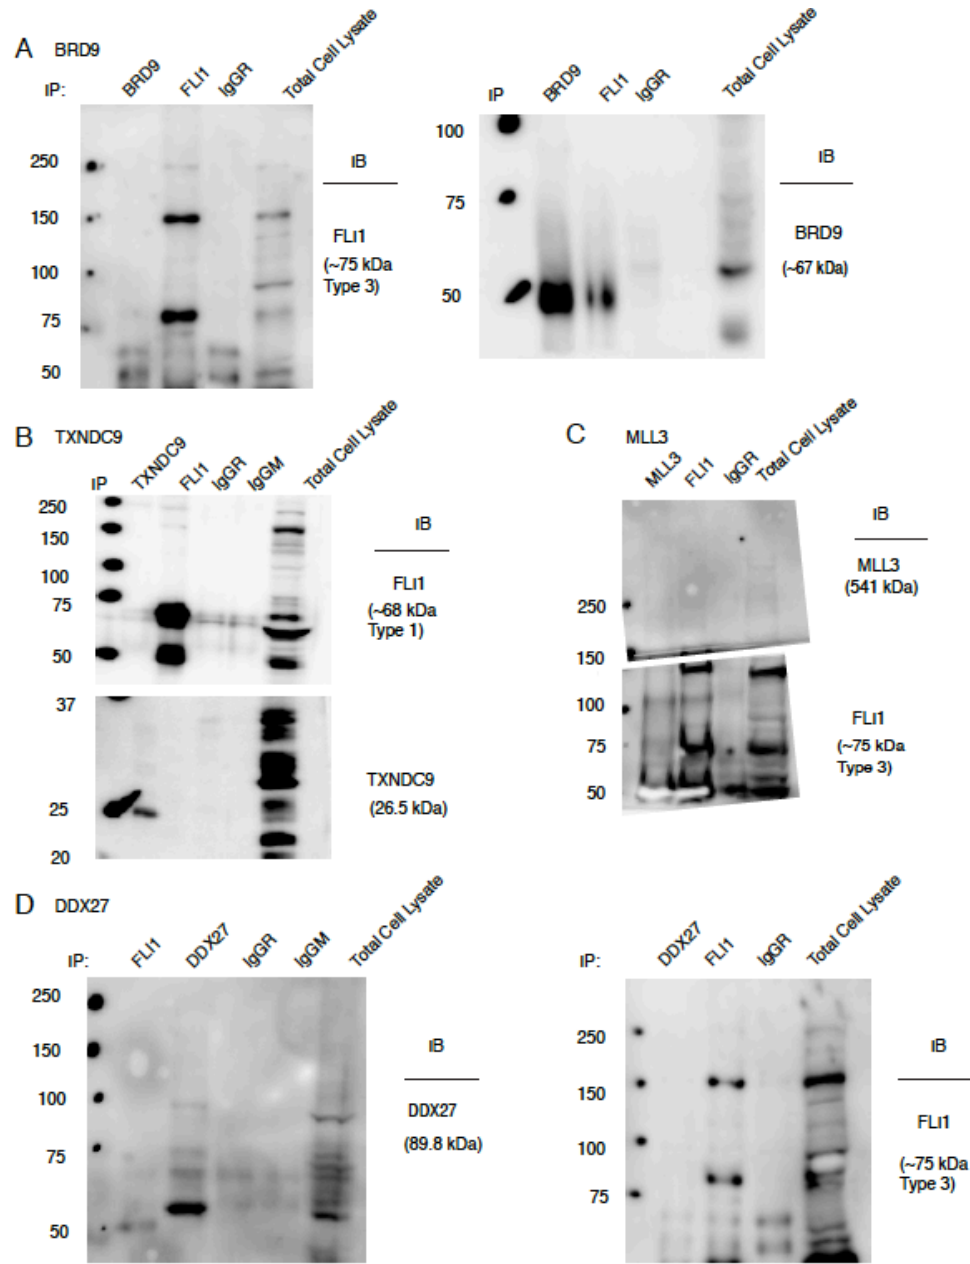

Legend: Coimmunoprecipitations with potential cognate protein and FLI1 antibodies

# SUPPLEMENTAL FIGURE 4

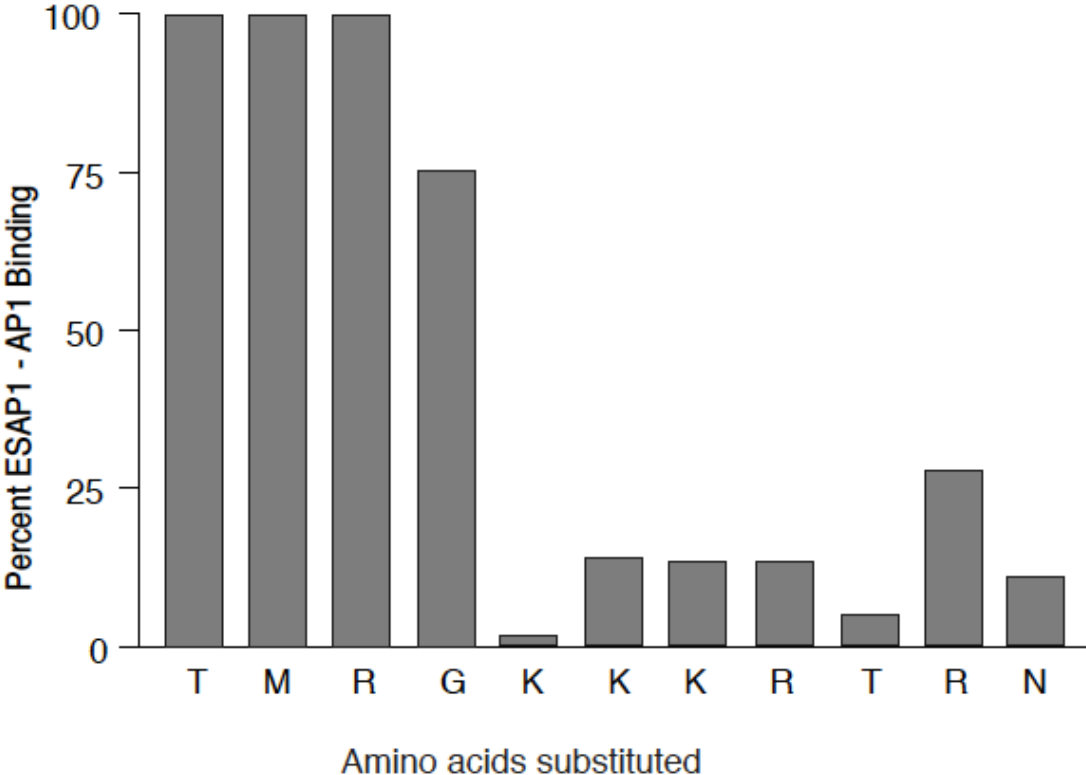

Legend: Binding of alanine substituted ESAP1 to EWS-FLI1

SUPPLEMENTAL FIGURE 5

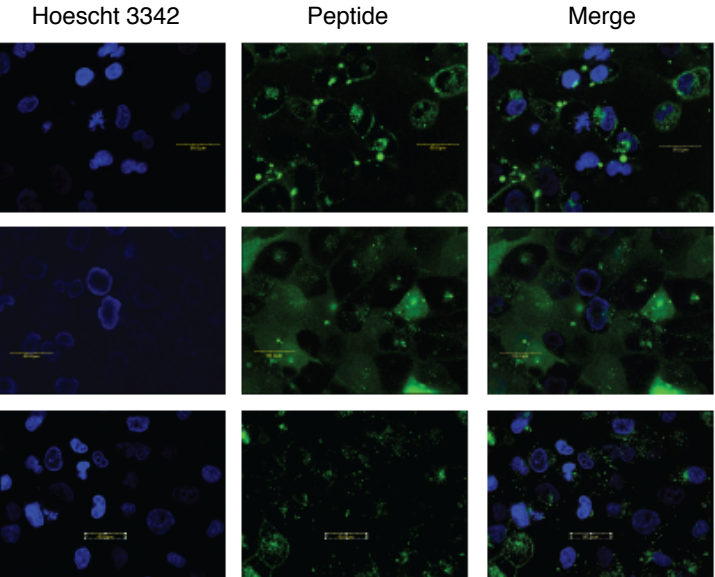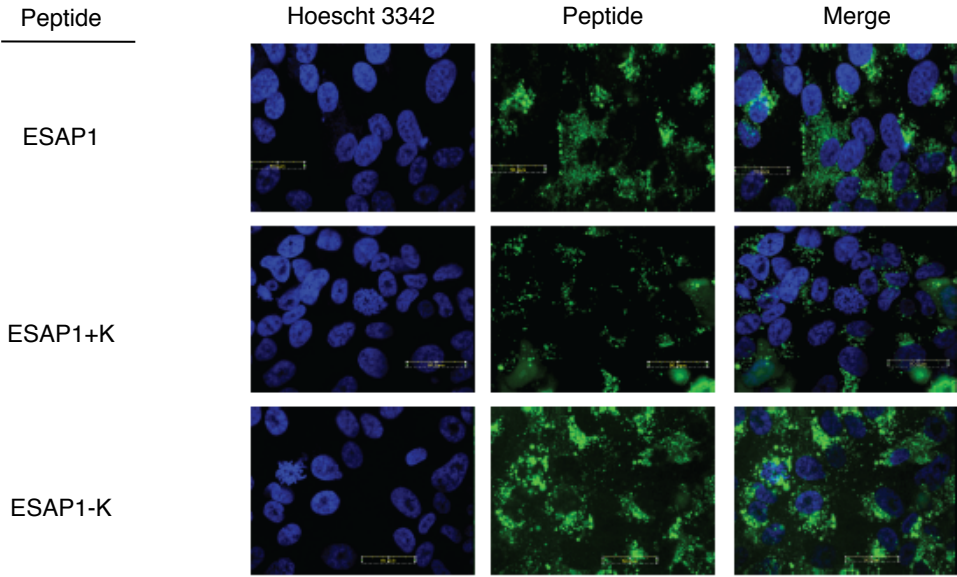

# SUPPLEMENTAL FIGURE 6

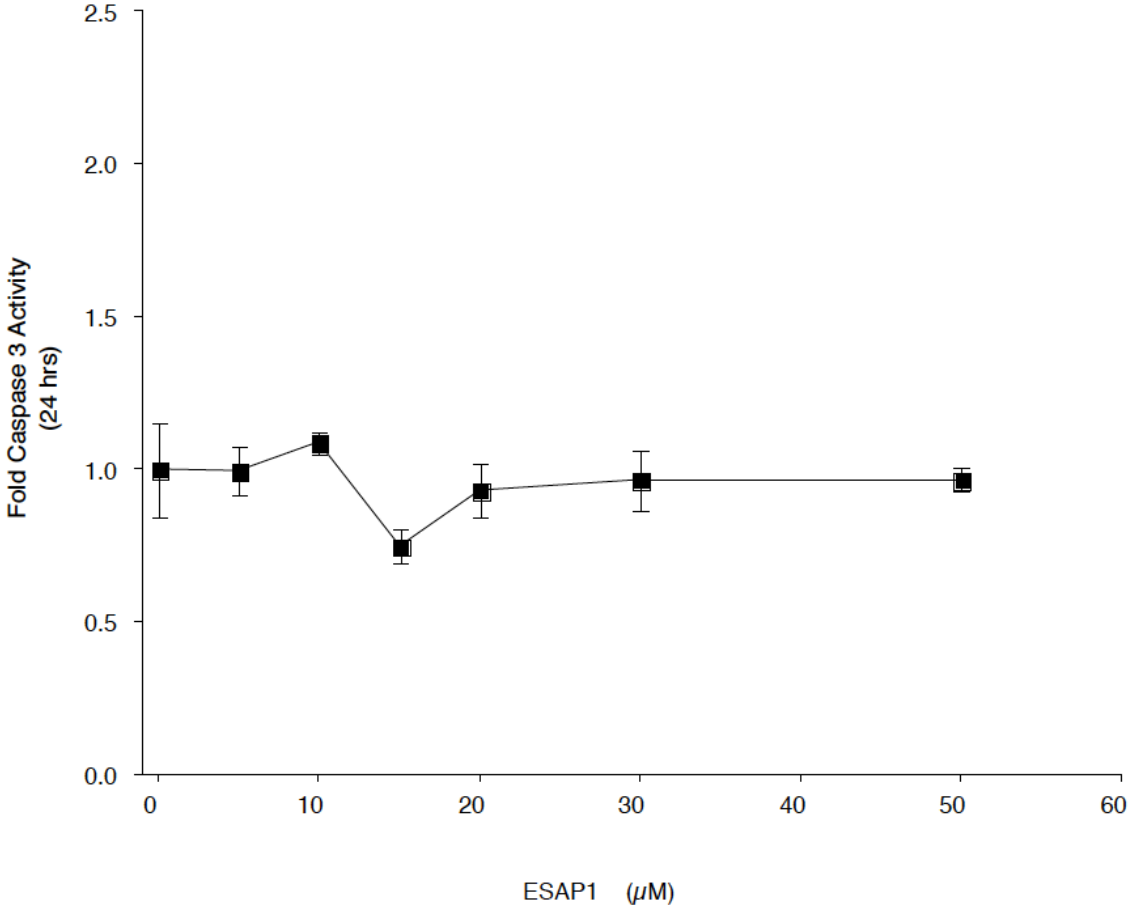

Legend: Caspase-3 activity assay. TC71 cells were treated with ESAP1 peptide for 24 hours. Caspase-3 activity was measured and normalized to non-treated TC71 caspase-3 basal activity.

## SUPPLEMENTAL FIGURE 7

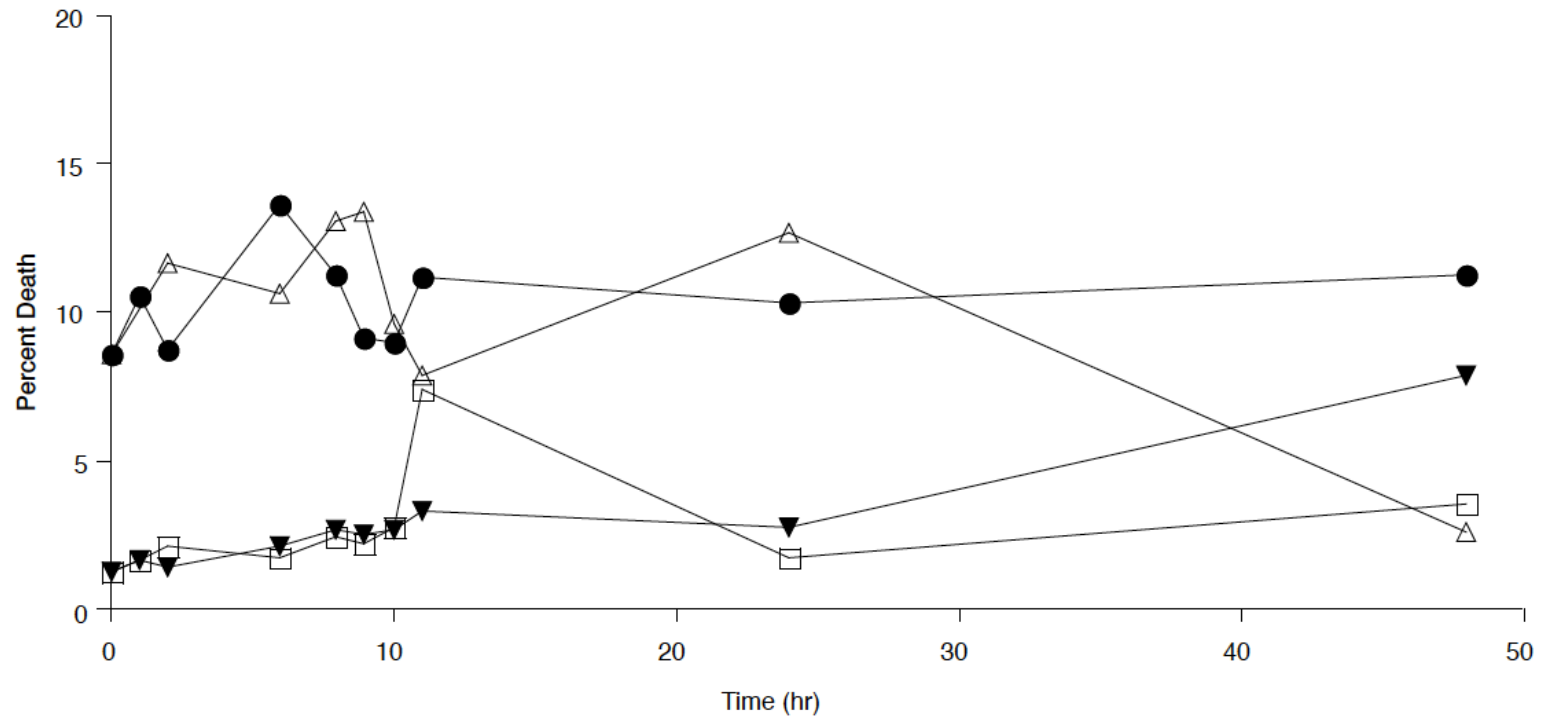

Legend: Percent death caused by ESAP1 treatment. Death cell fractions were obtained from DNA histogram of either synchronized or non synchronized cells that were treated with ESAP1. □ represent cells without any treatment. △ represent cells blocked with Nocadazole and released without any further treatment. ▼ ESAP1 treated cells without Nocadazole block. ● represent cells blocked with Nocadazole then treated with ESAP1.
